# Supplementary material for: The bactericidal effect of an ionizer under low concentration of ozone
Source: PubMed Central journal article supplement (PMC4967512; doi:10.1186/s12866-016-0785-5), 2016-07-30

(A)

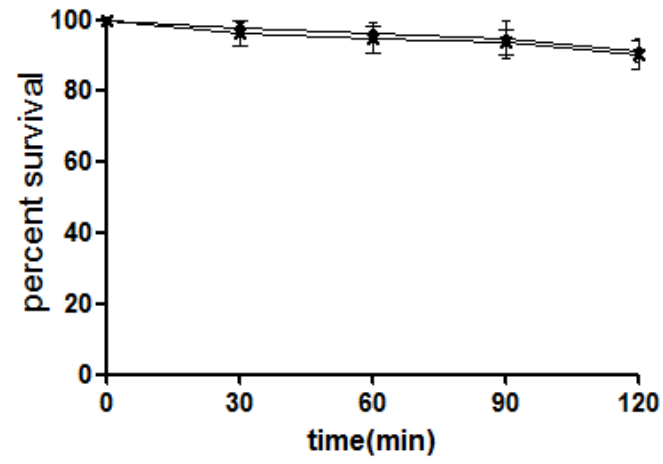

(B)

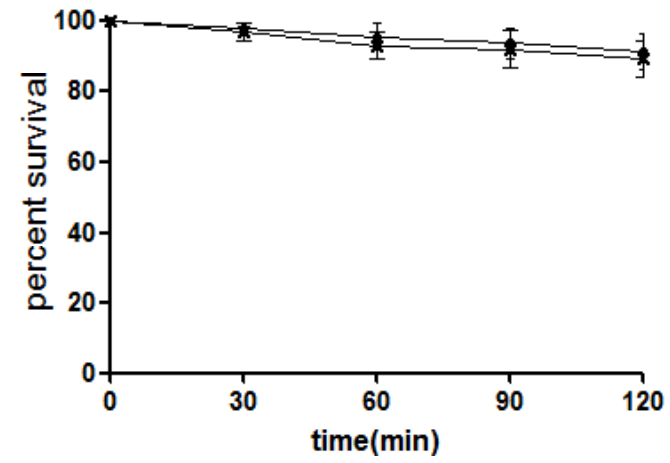

(C)

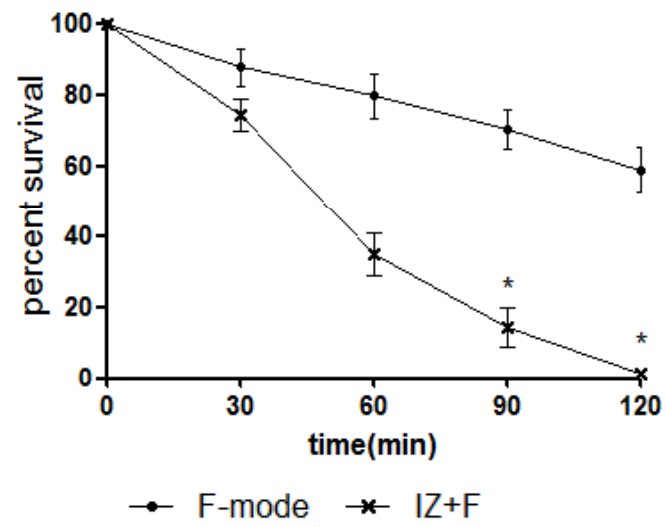

(D)

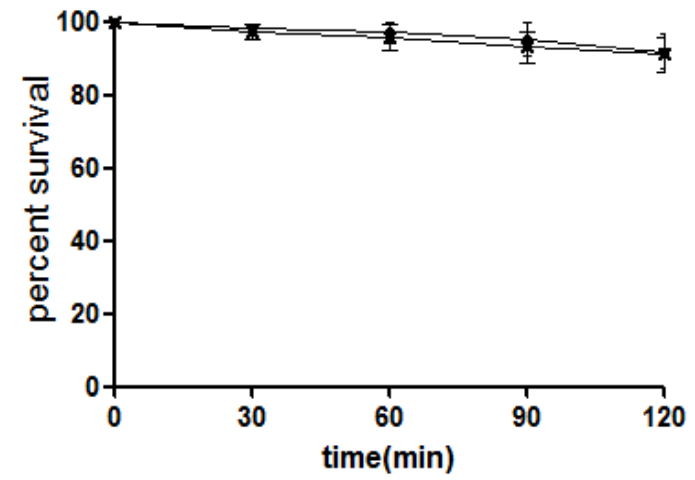

Supplement: 12866_2016_785_MOESM1_ESM.pdf [file 12866_2016_785_MOESM1_ESM.pdf]
